# Supplementary material for: Rollout of community-based family health strategy (programa de saude de familia) is associated with large reductions in neonatal mortality in São Paulo, Brazil
Source: PubMed Central journal article supplement — SSM Popul Health. 2016 Feb 21;2:55–61. doi: 10.1016/j.ssmph.2016.01.001 (PMC5757818; doi:10.1016/j.ssmph.2016.01.001), 2016-02-21

## Supplemental Information

**Table S1: Number of Births by Health Program and Year**

|                    | <b>Total Number of Births</b> | <b>Births in Area Covered by FHSteam</b> | <b>Percentage of Births Covered by PSF</b> |
|--------------------|-------------------------------|------------------------------------------|--------------------------------------------|
| 2003 <sup>a)</sup> | 1,960                         | 224                                      | 11.4%                                      |
| 2004               | 2,761                         | 454                                      | 16.4%                                      |
| 2005               | 3,271                         | 644                                      | 19.7%                                      |
| 2006               | 3,047                         | 524                                      | 17.2%                                      |
| 2007               | 2,848                         | 547                                      | 19.2%                                      |
| 2008               | 2,714                         | 559                                      | 20.6%                                      |
| 2009               | 2,804                         | 665                                      | 23.7%                                      |
| 2010               | 2,796                         | 781                                      | 27.9%                                      |
| 2011               | 3,015                         | 936                                      | 31.0%                                      |
| 2012 <sup>b)</sup> | 2,731                         | 880                                      | 32.2%                                      |

Notes: a) Birth records start on April 1, 2003 b) Excluding births from December 2012 due to incomplete mortality data – at the time of the study mortality data from 2013 was not available from the vital registration system yet.

**Table S2: Child Mortality by Cause of Death**

| <b>Cause of Death</b>                      | <u>Age at death &lt; 28D</u> |            | <u>Age at death ≥ 28D</u> |            | <u>All ages</u> |          |
|--------------------------------------------|------------------------------|------------|---------------------------|------------|-----------------|----------|
|                                            | <i>Cases</i>                 | <i>(%)</i> | <i>Cases</i>              | <i>(%)</i> | <i>Cases</i>    | <i>%</i> |
| Neonatal infections                        | 34                           | 28.3       | 21                        | 25.0       | 55              | 27.0     |
| Congenital anomalies                       | 25                           | 20.8       | 27                        | 32.1       | 52              | 25.5     |
| Prematurity                                | 36                           | 30.0       | 1                         | 1.2        | 37              | 18.1     |
| Asphyxia and birth trauma                  | 21                           | 17.5       | 2                         | 2.4        | 23              | 11.3     |
| Cardiovascular, endocrine & nervous system | 1                            | 0.8        | 19                        | 22.6       | 20              | 9.8      |
| Infectious diseases                        | 3                            | 2.5        | 10                        | 11.9       | 13              | 6.4      |
| Other (incl. cancer and malnutrition)      | 0                            | 0.0        | 4                         | 4.8        | 4               | 2.0      |
| Total                                      | 120                          | 100        | 84                        | 100        | 204             | 100.0    |

**Figure S1: Spatial Location of Study Site (Butantã-Jaguare) within the larger São Paulo Municipality**

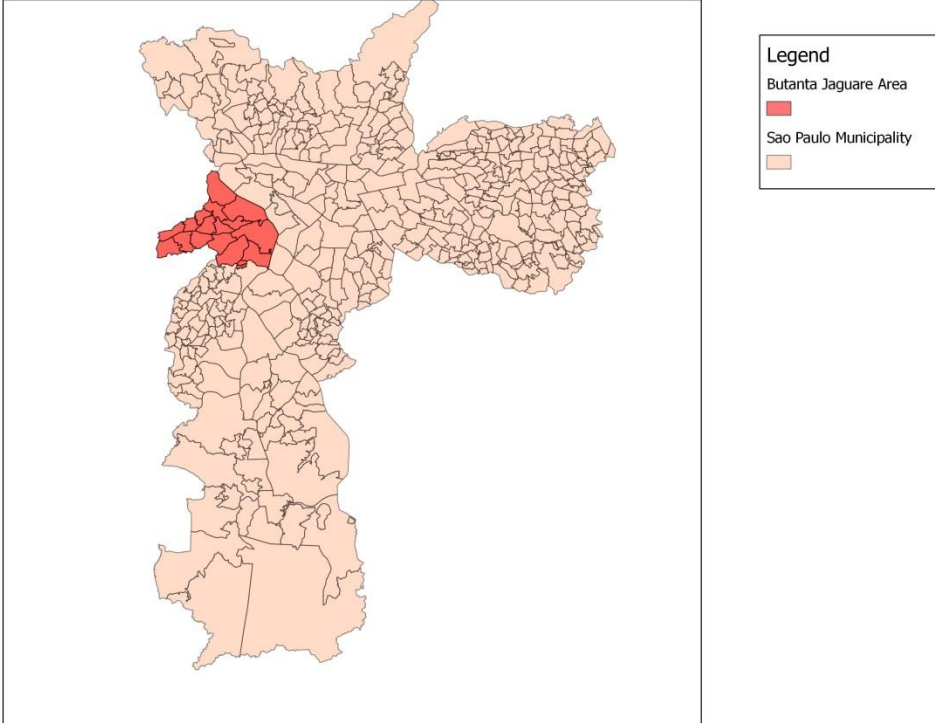

**Figure S2: FHSCoverage 2012**

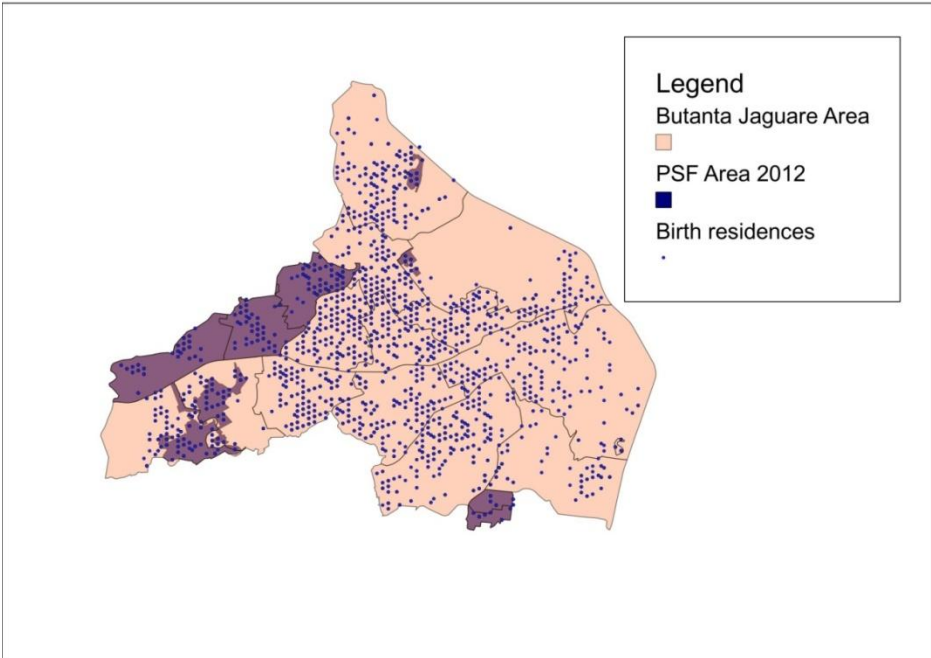

Figure S3: Spatial Coverage over Time

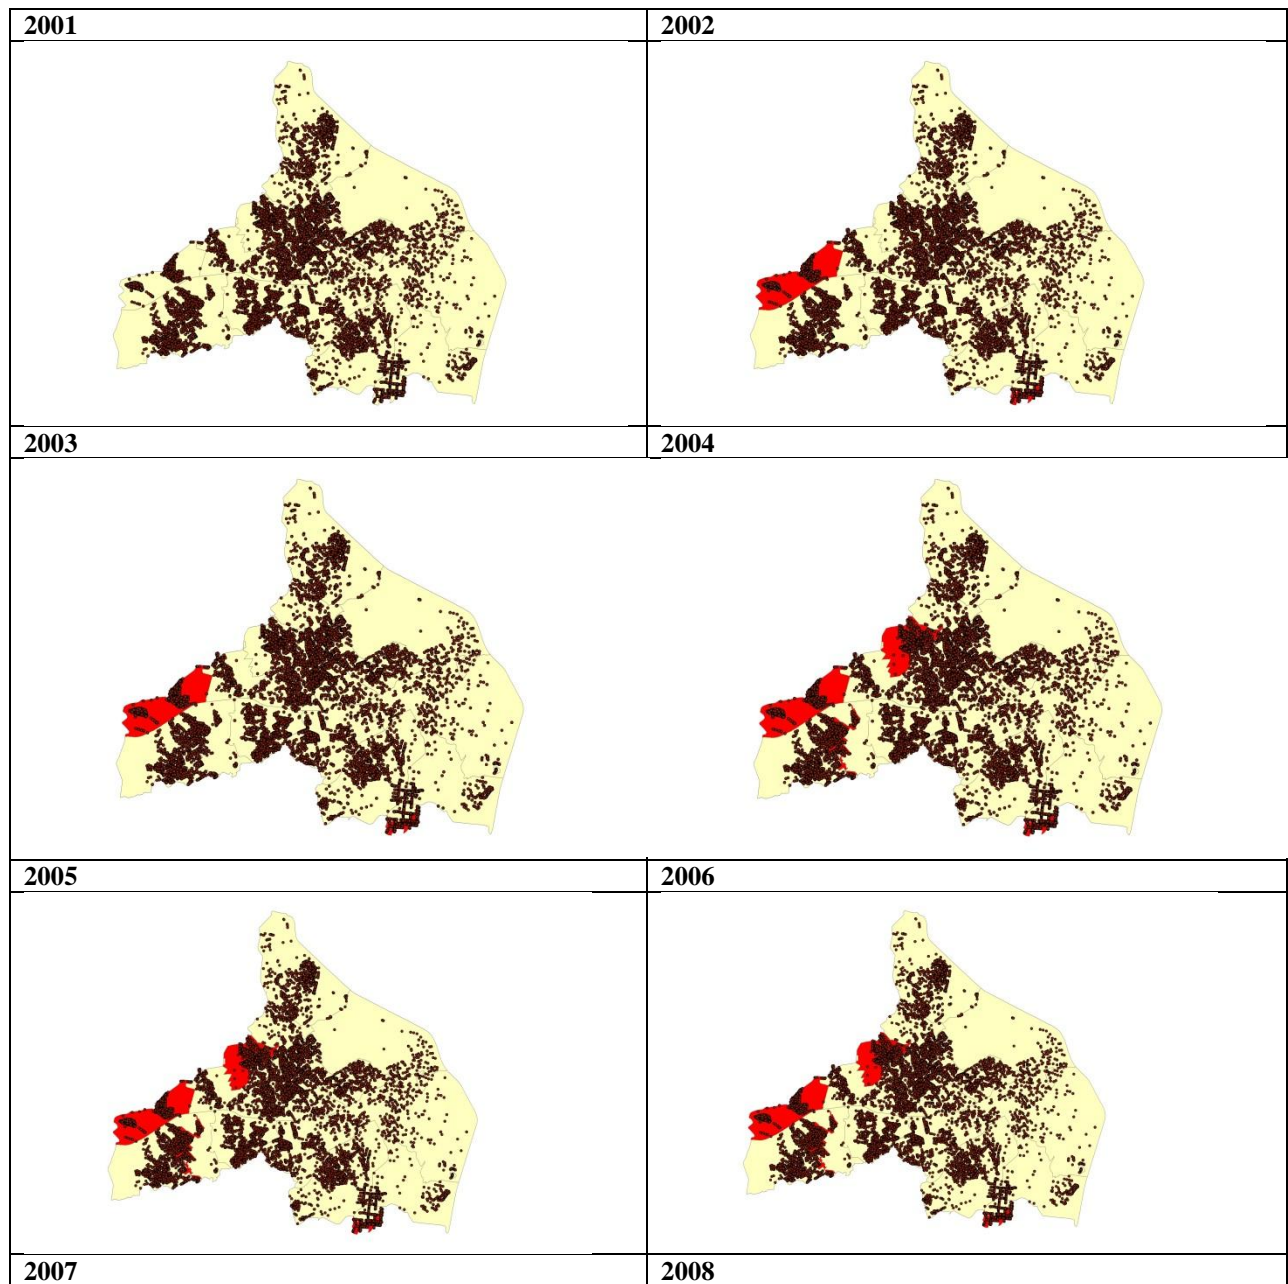

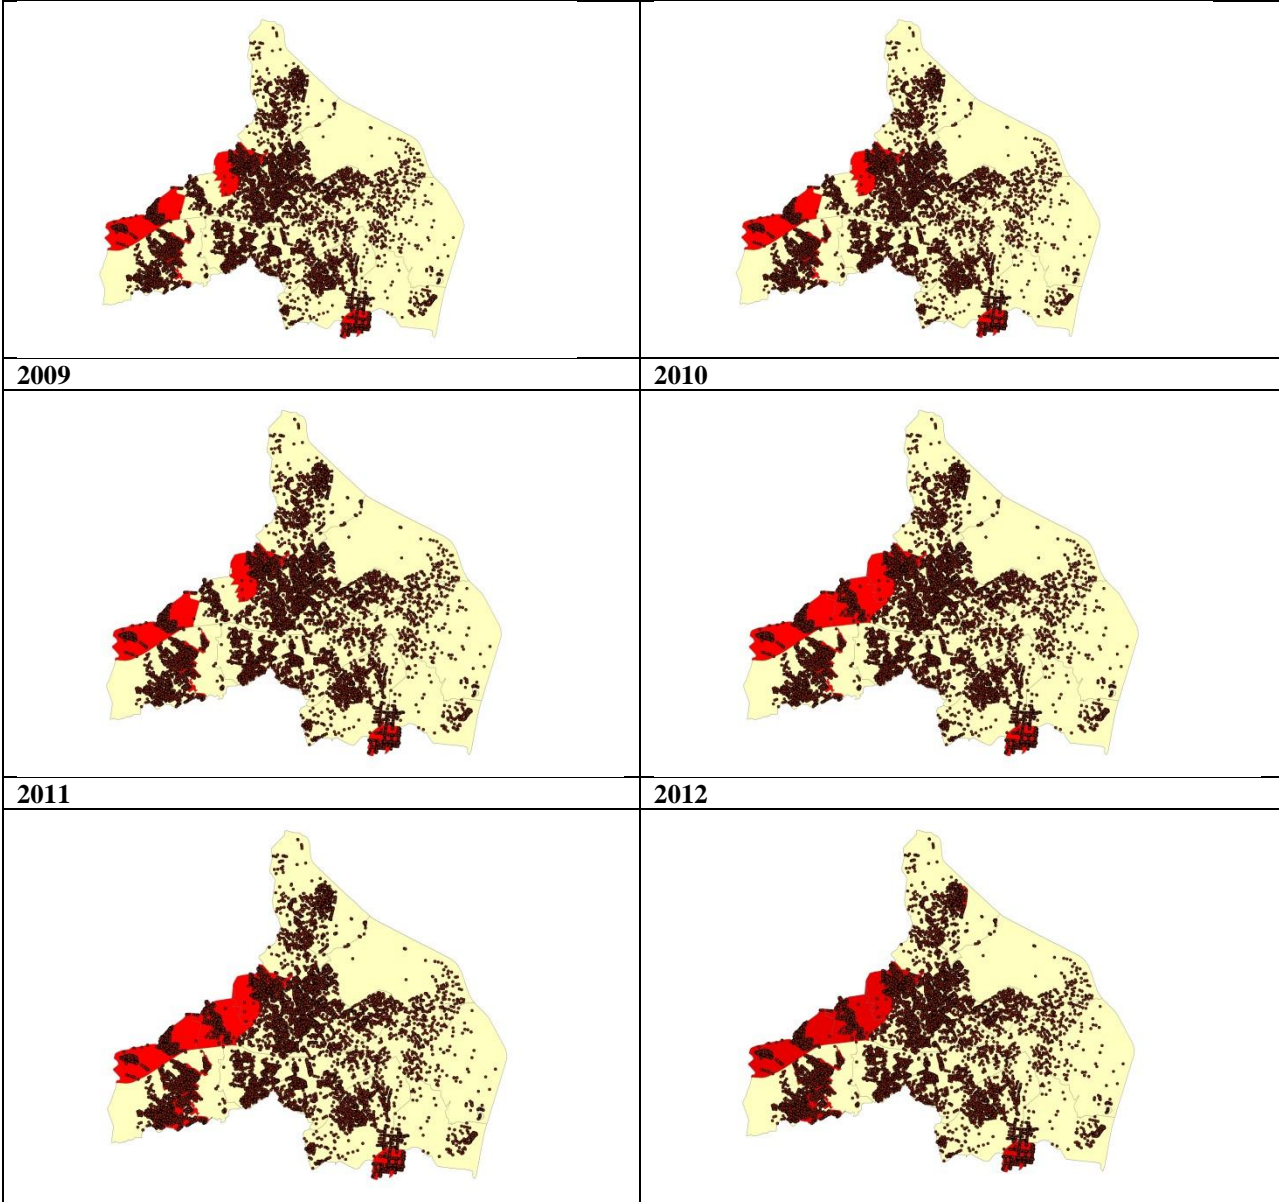

Figure S4 Child Mortality Impact by Birth Cohort

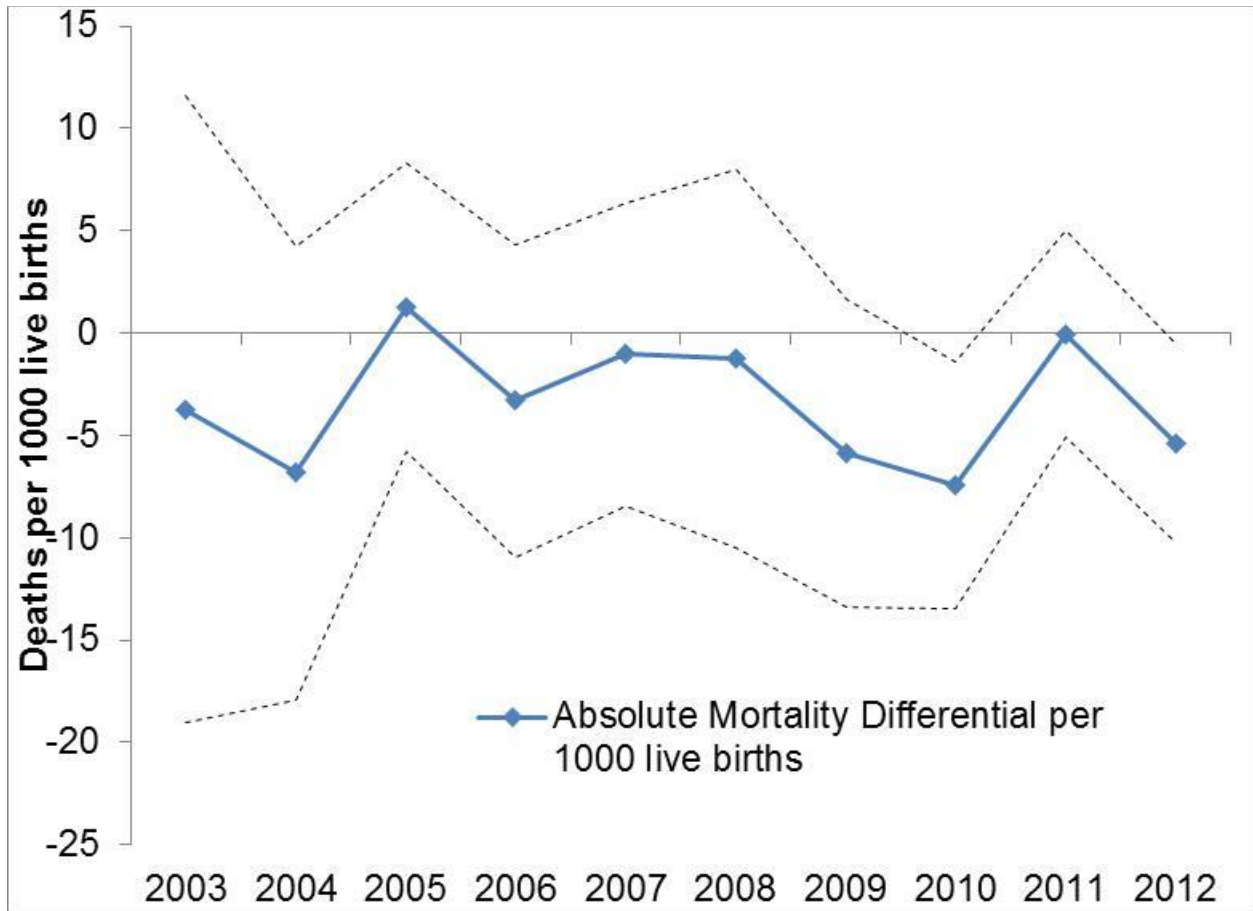

Supplement: mmc1.pdf [file mmc1.pdf]
